# Supplementary material
Source: MDPI journal article supplement (https://www.mdpi.com/1424-8247/15/11/1336)
Supplement: s1 [file s1]

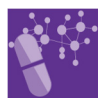

## Supplementary Materials:

Table S1. Clinical pathological parameters of 178 patients with PAAD from TCGA database.

| Covariates | Type      | Total       | Train      | Test       | <i>p</i> -Value |
|------------|-----------|-------------|------------|------------|-----------------|
| Age        | ≤65       | 94(52.81%)  | 47(52.81%) | 47(52.81%) | 1               |
|            | >65       | 84(47.19%)  | 42(47.19%) | 42(47.19%) |                 |
| Gender     | FEMALE    | 80(44.94%)  | 38(42.7%)  | 42(47.19%) | 0.6512          |
|            | MALE      | 98(55.06%)  | 51(57.3%)  | 47(52.81%) |                 |
| Grade      | G1        | 31(17.42%)  | 18(20.22%) | 13(14.61%) | 0.805           |
|            | G2        | 95(53.37%)  | 46(51.69%) | 49(55.06%) |                 |
|            | G3        | 48(26.97%)  | 23(25.84%) | 25(28.09%) |                 |
|            | G4        | 2(1.12%)    | 1(1.12%)   | 1(1.12%)   |                 |
|            | unknow    | 2(1.12%)    | 1(1.12%)   | 1(1.12%)   |                 |
| Stage      | Stage I   | 21(11.8%)   | 10(11.24%) | 11(12.36%) | 0.1806          |
|            | Stage II  | 147(82.58%) | 78(87.64%) | 69(77.53%) |                 |
|            | Stage III | 3(1.69%)    | 1(1.12%)   | 2(2.25%)   |                 |
|            | Stage IV  | 4(2.25%)    | 0(0%)      | 4(4.49%)   |                 |
|            | unknow    | 3(1.69%)    | 0(0%)      | 3(3.37%)   |                 |
| T          | T1        | 7(3.93%)    | 4(4.49%)   | 3(3.37%)   | 0.8918          |
|            | T2        | 24(13.48%)  | 13(14.61%) | 11(12.36%) |                 |
|            | T3        | 142(79.78%) | 71(79.78%) | 71(79.78%) |                 |
|            | T4        | 3(1.69%)    | 1(1.12%)   | 2(2.25%)   |                 |
|            | unknow    | 2(1.12%)    | 0(0%)      | 2(2.25%)   |                 |
| M          | M0        | 80(44.94%)  | 38(42.7%)  | 42(47.19%) | 0.1777          |
|            | M1        | 4(2.25%)    | 0(0%)      | 4(4.49%)   |                 |
|            | unknow    | 94(52.81%)  | 51(57.3%)  | 43(48.31%) |                 |
| N          | N0        | 49(27.53%)  | 25(28.09%) | 24(26.97%) | 0.9619          |
|            | N1        | 124(69.66%) | 61(68.54%) | 63(70.79%) |                 |
|            | unknow    | 5(2.81%)    | 3(3.37%)   | 2(2.25%)   |                 |

**Table S2.** The primers for RT-PCR in this study.

| Genes              | Primer                        |
|--------------------|-------------------------------|
| 18s forward        | 5'-ATCACCATTATGCAGAATCCACG-3' |
| 18s reverse        | 5'-GACCTGGCTGTATTTTCCATCC-3'  |
| GHR forward        | 5'-CCATTGCCCTCAACTGGACTT-3'   |
| GHR reverse        | 5'-AATATCTGCATTGCGTGGTGC-3'   |
| BCAT1 forward      | 5'-GTGGAGTGGTCCTCAGAGTTT-3'   |
| BCAT1 reverse      | 5'-AGCCAGGGTGCAATGACAG-3'     |
| C14orf132 forward  | 5'-CGCCCAACGAGGACTTCAG-3'     |
| C14orf132 reverse  | 5'-ATGGCAATCCATAGCAAGACG-3'   |
| SEMA3C forward     | 5'-TTTGCGTGTGGTTGGAGTAT-3'    |
| SEMA3C reverse     | 5'-TCCTGTAGTCTAAAGGATGGTGG-3' |
| E-cadherin forward | 5'-CGAGAGCTACACGTTACGG-3'     |
| E-cadherin reverse | 5'-GGGTGTCGAGGGAAAAATAGG-3'   |
| N-cadherin forward | 5'-TCAGGCGTCTGTAGAGGCTT-3'    |
| N-cadherin reverse | 5'-ATGCACATCCTTCGATAAGACTG-3' |
| Vimentin forward   | 5'-GACGCCATCAACACCGAGTT-3'    |
| Vimentin reverse   | 5'-CTTTGTCGTTGGTTAGCTGGT-3'   |

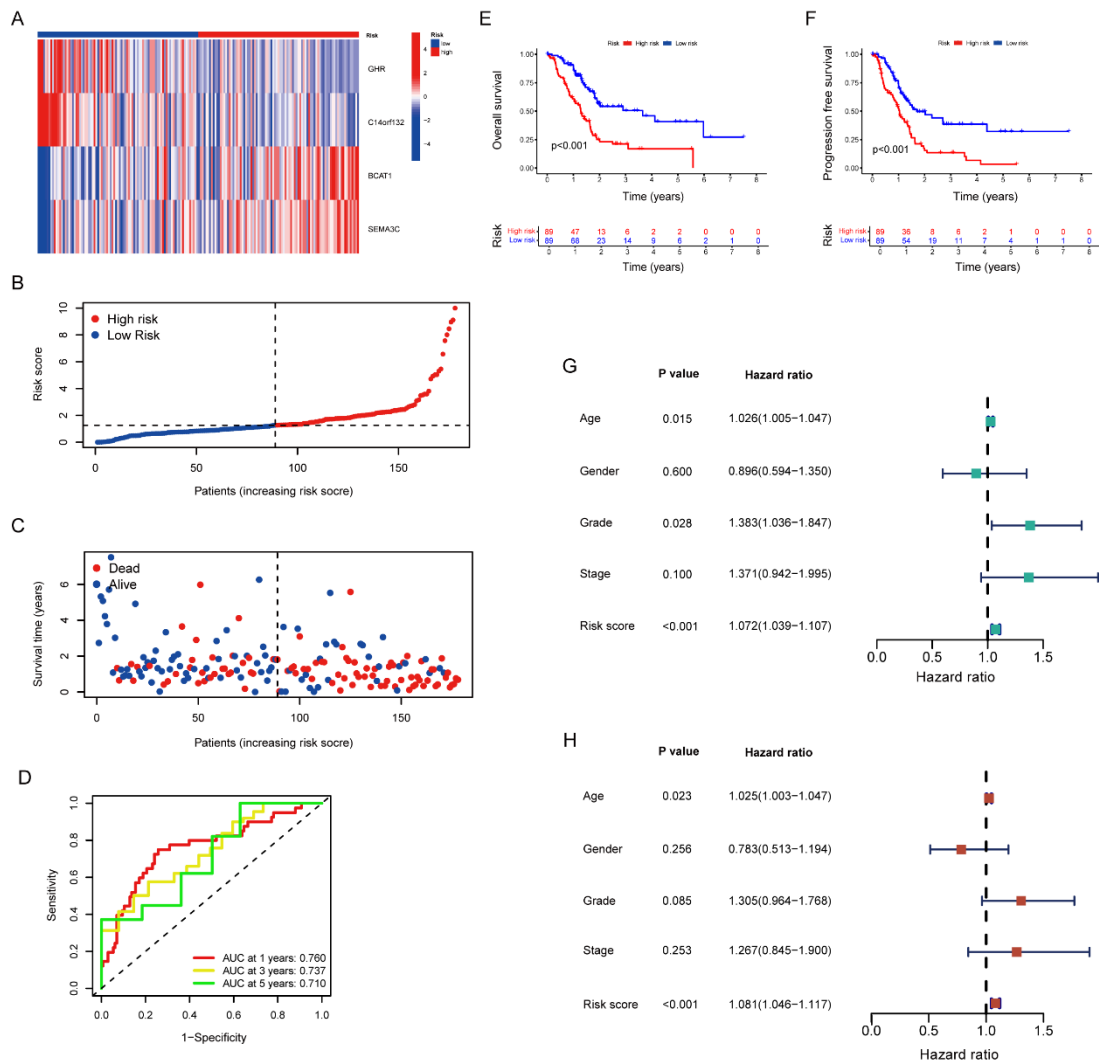

**Figure S1.** The Prognostic Value of Stroma- and Metastasis-Associated Risk Score Model in the Entire Cohort. (A) The heat map illustrated the expression of four genes in each sample. (B) The distribution of low- and high-risk samples. (C) The correlation of risk score, survival status and

survival time (D) ROC curve of the risk score. (E,F) Kaplan–Meier curve of overall survival and progression-free survival in low- and high-risk groups. (G,H) The univariate and multivariate Cox regression analysis of clinical characteristics and risk score.

**Table S3.** The primers for RT-PCR in this study.

| Num-<br>ber | Gender | Age | Liver<br>Metastasis | Tumor<br>Size | Metastatic<br>Lesion<br>Diameter | Lymphatic<br>Metastasis | Perineural<br>Invasion | Survival<br>Status | Overall<br>Survival<br>(Month) |
|-------------|--------|-----|---------------------|---------------|----------------------------------|-------------------------|------------------------|--------------------|--------------------------------|
| 1           | Male   | 57  | Yes                 | 5.5           | 2.0                              | No                      | No                     | 0                  | 46.0                           |
| 3           | Male   | 59  | Yes                 | 5.5           | 2.0                              | No                      | Yes                    | 1                  | 13.5                           |
| 7           | Female | 48  | Yes                 | 5.0           | 1.0                              | Yes                     | Yes                    | 1                  | 4.1                            |
| 8           | Male   | 68  | Yes                 | 10.0          | 2.5                              | No                      | No                     | 1                  | 7.3                            |
| 10          | Female | 67  | Yes                 | 4.0           | 1.2                              | No                      | Yes                    | 1                  | 16.5                           |
| 12          | Male   | 75  | Yes                 | 3.5           | 0.6                              | Yes                     | No                     | 1                  | 17.1                           |
| 13          | Female | 53  | Yes                 | 2.5           | 1.4                              | No                      | No                     | 0                  | 18.0                           |
| 14          | Male   | 57  | Yes                 | 4.5           | 1.0                              | No                      | No                     | 1                  | 16.1                           |
| 15          | Male   | 63  | Yes                 | 3.0           | 0.7                              | No                      | Yes                    | 1                  | 7.8                            |
| 17          | Female | 64  | Yes                 | 5.0           | 1.8                              | Yes                     | Yes                    | 1                  | 6.0                            |
| 18          | Male   | 64  | Yes                 | 4.8           | 1.3                              | Yes                     | Yes                    | 1                  | 6.0                            |

**Table S4.** Clinical information of RenJi sample.

| ID | Age | Gender | CEA   | CA199   | Stage | Risk | Survival Status | Overall Survival<br>(Month) |
|----|-----|--------|-------|---------|-------|------|-----------------|-----------------------------|
| 1  | 72  | FeMale | 4.00  | 10.86   | IIA   | Low  | 0               | 67.4                        |
| 2  | 56  | Male   | 6.82  | 360.20  | IV    | Low  | 0               | 59.8                        |
| 4  | 67  | Male   | 1.72  | 72.01   | IIB   | Low  | 0               | 56.3                        |
| 5  | 71  | FeMale | 17.20 | 400.30  | IV    | High | 1               | 15.1                        |
| 7  | 62  | FeMale | 50.92 | 4110.00 | IV    | High | 1               | 15.3                        |
| 8  | 72  | FeMale | 3.88  | 330.90  | IV    | High | 1               | 5.3                         |
| 9  | 69  | FeMale | 7.59  | 1.82    | IIA   | Low  | 1               | 50.6                        |
| 10 | 65  | Male   | 27.30 | 303.30  | IIB   | High | 1               | 46.3                        |
| 11 | 45  | FeMale | 3.51  | 204.80  | III   | High | 0               | 61.3                        |
| 12 | 69  | FeMale | 10.87 | 40.45   | III   | High | 1               | 19.4                        |
| 13 | 63  | Male   | 1.54  | 132.50  | IIB   | Low  | 0               | 145.8                       |
| 15 | 71  | FeMale | 1.85  | 161.30  | III   | Low  | 1               | 17.3                        |
| 16 | 68  | FeMale | 2.08  | 110.70  | III   | High | 1               | 36.7                        |
| 17 | 75  | Male   | 5.09  | 928.60  | IV    | Low  | 1               | 46.9                        |
| 19 | 65  | FeMale | 2.88  | 135.70  | III   | Low  | 1               | 138.4                       |
| 20 | 71  | FeMale | 30.83 | 50.84   | III   | High | 1               | 37.8                        |
| 21 | 68  | FeMale | 1.21  | 83.85   | III   | Low  | 1               | 103.9                       |
| 22 | 75  | Male   | 2.62  | 2248.00 | III   | High | 0               | 51.4                        |
| 23 | 53  | Male   | 2.71  | 216.30  | III   | Low  | 1               | 35.2                        |
| 24 | 50  | FeMale | 2.83  | 110.60  | IB    | High | 0               | 31.8                        |
| 25 | 68  | Male   | 2.70  | 98.07   | III   | Low  | 0               | 31.3                        |

---

|    |    |        |       |         |     |      |   |       |
|----|----|--------|-------|---------|-----|------|---|-------|
| 26 | 60 | FeMale | 2.74  | 15.06   | IIA | Low  | 1 | 26.5  |
| 27 | 71 | Male   | 4.51  | 1.65    | IB  | Low  | 1 | 133.8 |
| 29 | 66 | Male   | 4.55  | 220.80  | III | Low  | 1 | 45.0  |
| 30 | 73 | Male   | 1.16  | 198.00  | III | Low  | 1 | 43.3  |
| 31 | 65 | FeMale | 2.82  | 88.27   | III | High | 1 | 37.8  |
| 32 | 76 | Male   | 2.78  | 10.46   | IB  | Low  | 1 | 25.1  |
| 33 | 79 | Male   | 19.99 | 82.14   | IIB | High | 0 | 22.2  |
| 34 | 63 | Male   | 2.11  | 695.20  | IV  | High | 1 | 14.4  |
| 35 | 69 | FeMale | 1.17  | 69.87   | IIB | Low  | 0 | 126.2 |
| 36 | 47 | Male   | 9.80  | 42.15   | IIB | Low  | 0 | 125.0 |
| 37 | 64 | Male   | 1.87  | 1176.00 | III | High | 1 | 97.6  |
| 39 | 58 | FeMale | 2.42  | 2673.00 | IV  | High | 0 | 11.2  |
| 40 | 55 | Male   | 27.16 | 281.40  | III | High | 1 | 12.2  |
| 41 | 55 | Male   | 7.59  | 1526.00 | IV  | High | 0 | 12.2  |
| 42 | 76 | Male   | 3.50  | 72.90   | IIA | High | 0 | 9.5   |
| 43 | 87 | Male   | 2.33  | 86.45   | III | High | 0 | 9.2   |
| 44 | 62 | Male   | 6.13  | 328.10  | III | Low  | 0 | 67.8  |
| 45 | 77 | Male   | 2.13  | 12.45   | IB  | Low  | 1 | 33.7  |

---
